# Supplementary material for: Serological, microbiological and molecular investigation of Brucella infection in milk and blood of Iranian horses
Source: Research Square preprint supplement (doi:10.21203/rs.3.rs-69368/v1), 2020-10-08
Supplement: Supplementary file 1 [file d4157cdd933435217dee71be.docx]

| History of abortion | contact with other animals | Clinical appearance | Age | Milk consumption for human | Place | Code |
| --- | --- | --- | --- | --- | --- | --- |
|  |  |  |  | Yes/no |  |  |
|  |  |  |  |  |  |  |
|  |  |  |  |  |  |  |
